# Supplementary material for: Sex Differences in the Systemic and Local Immune Response of Pancreatic Cancer Patients
Source: MDPI journal article supplement (doi:10.3390/cancers15061815), 2023-03-17
Supplement: s1 [file s1]

## **SUPPLEMENTAL MATERIAL**

### **Sex differences in the systemic and local immune response of pancreatic cancer patients**

Azaz Ahmed<sup>1,2</sup>, Sophia Köhler<sup>1</sup>, Rosa Klotz<sup>3</sup>, Nathalia Giese<sup>3</sup>, Thilo Hackert<sup>3</sup>, Christoph Springfield<sup>1</sup>, Dirk Jäger<sup>1,4</sup>, Niels Halama<sup>1,2</sup>

<sup>1</sup> Medical Oncology and Internal Medicine VI, National Center for Tumor Diseases (NCT), University Hospital Heidelberg, University Heidelberg, 69120 Heidelberg, Germany

<sup>2</sup> Translational Immunotherapy, German Cancer Research Center (DKFZ), 69120 Heidelberg, Germany

<sup>3</sup> General, Visceral and Transplantation Surgery, University Hospital Heidelberg, University Heidelberg, 69120 Heidelberg, Germany

<sup>4</sup> Applied Tumor Immunity Clinical Cooperation Unit, National Center for Tumor Diseases (NCT), German Cancer Research Center (DKFZ), 69120 Heidelberg, Germany

Supplemental Figure S1

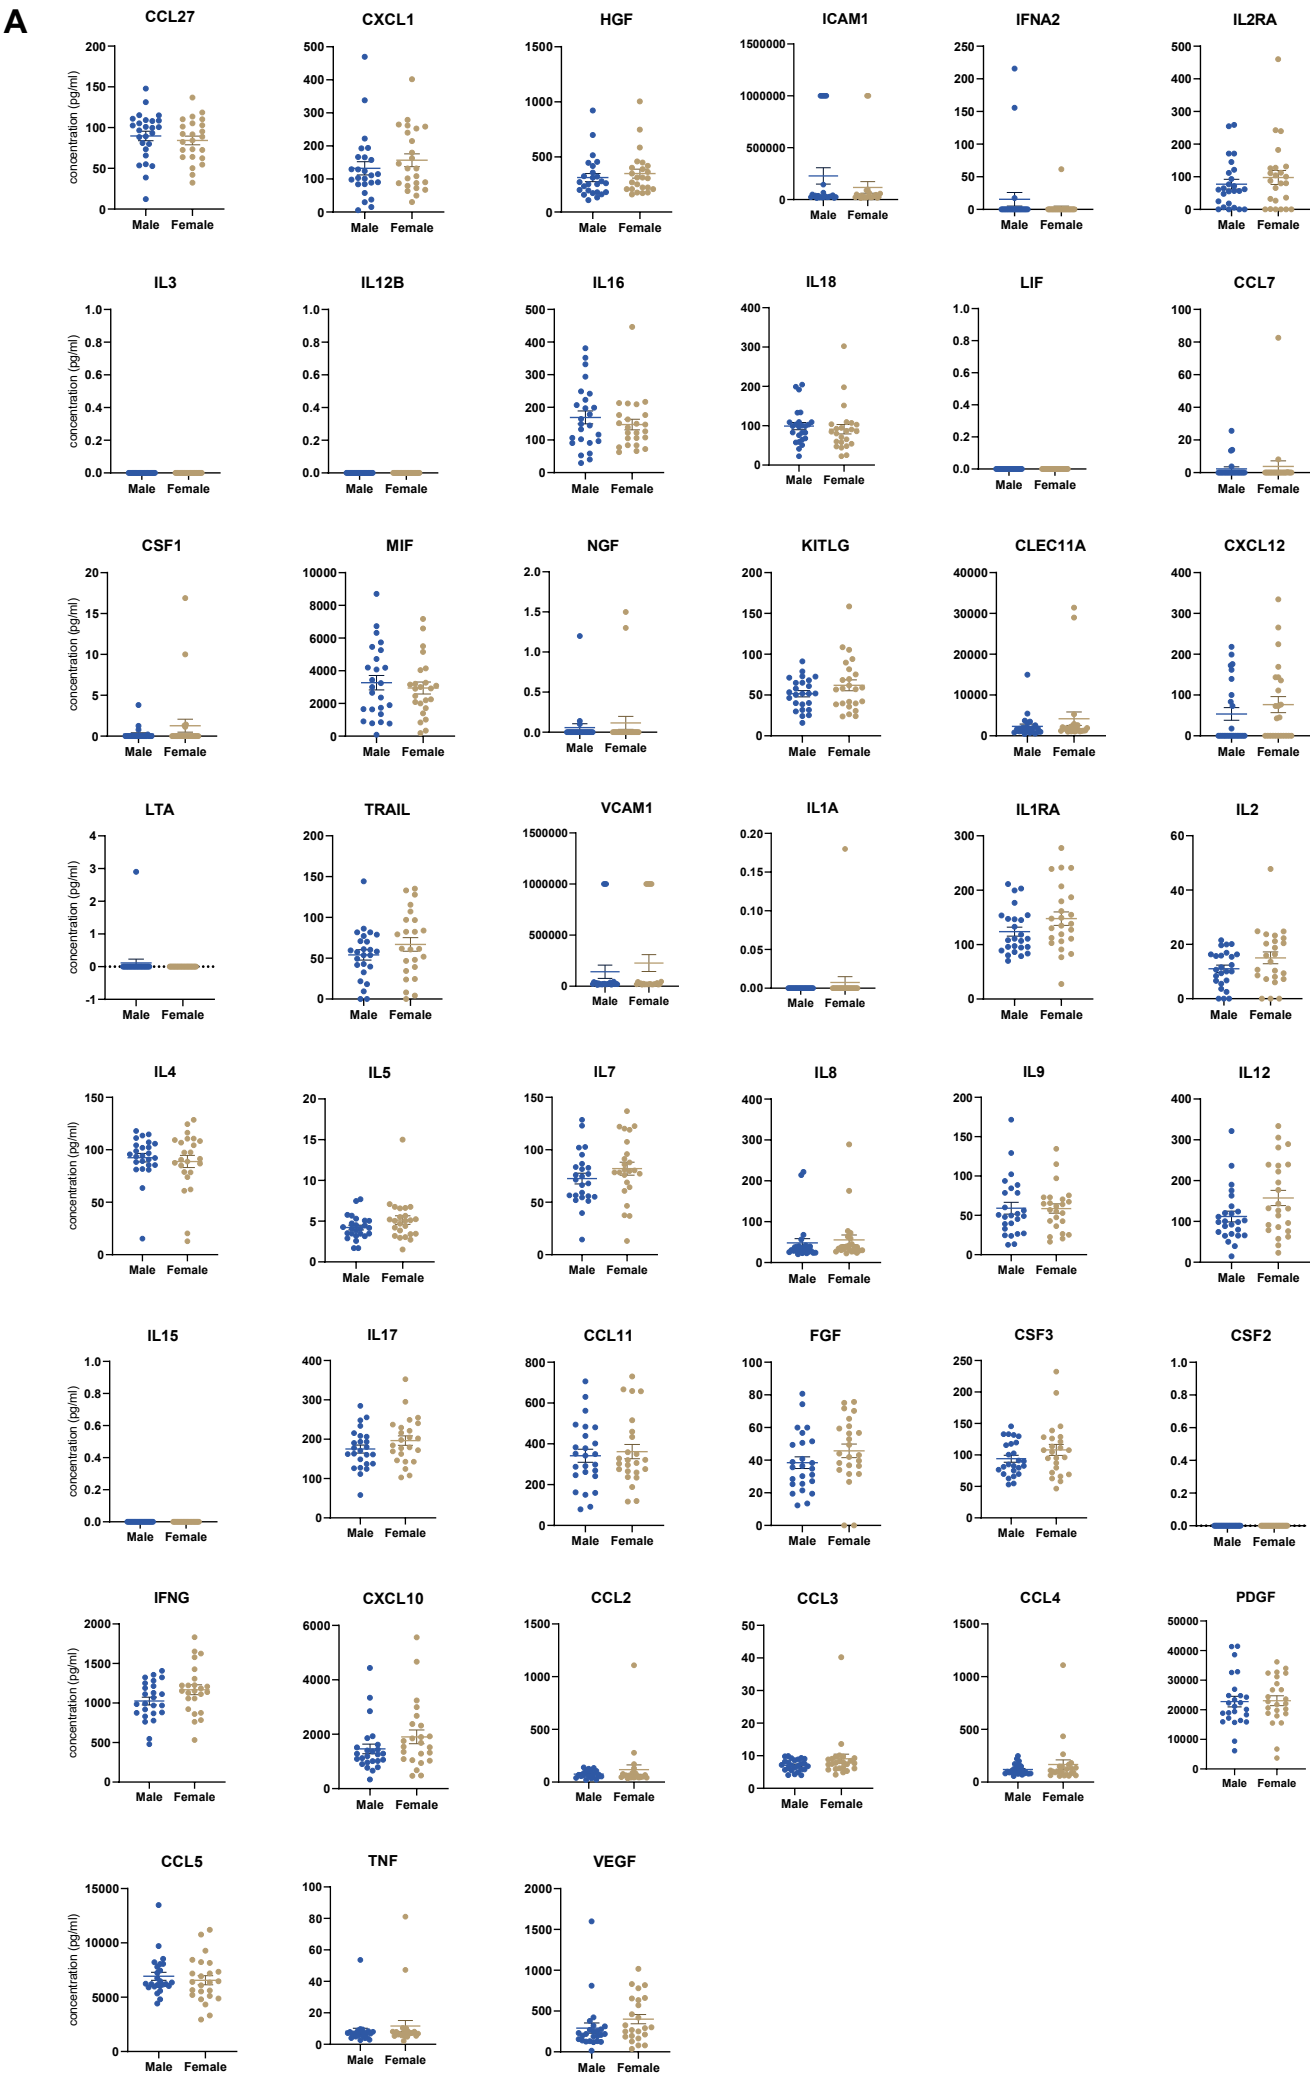

### B Correlation of serum IL6 and CRP levels

Scatter plot showing the correlation between  $\log_{10}(\text{CRP})$  (mg/l) on the y-axis and  $\log_{10}(\text{IL6})$  (pg/ml) on the x-axis. The plot displays a positive correlation with Spearman  $r = 0.49$  and  $p = 0.0007$ .

Supplemental Figure S1

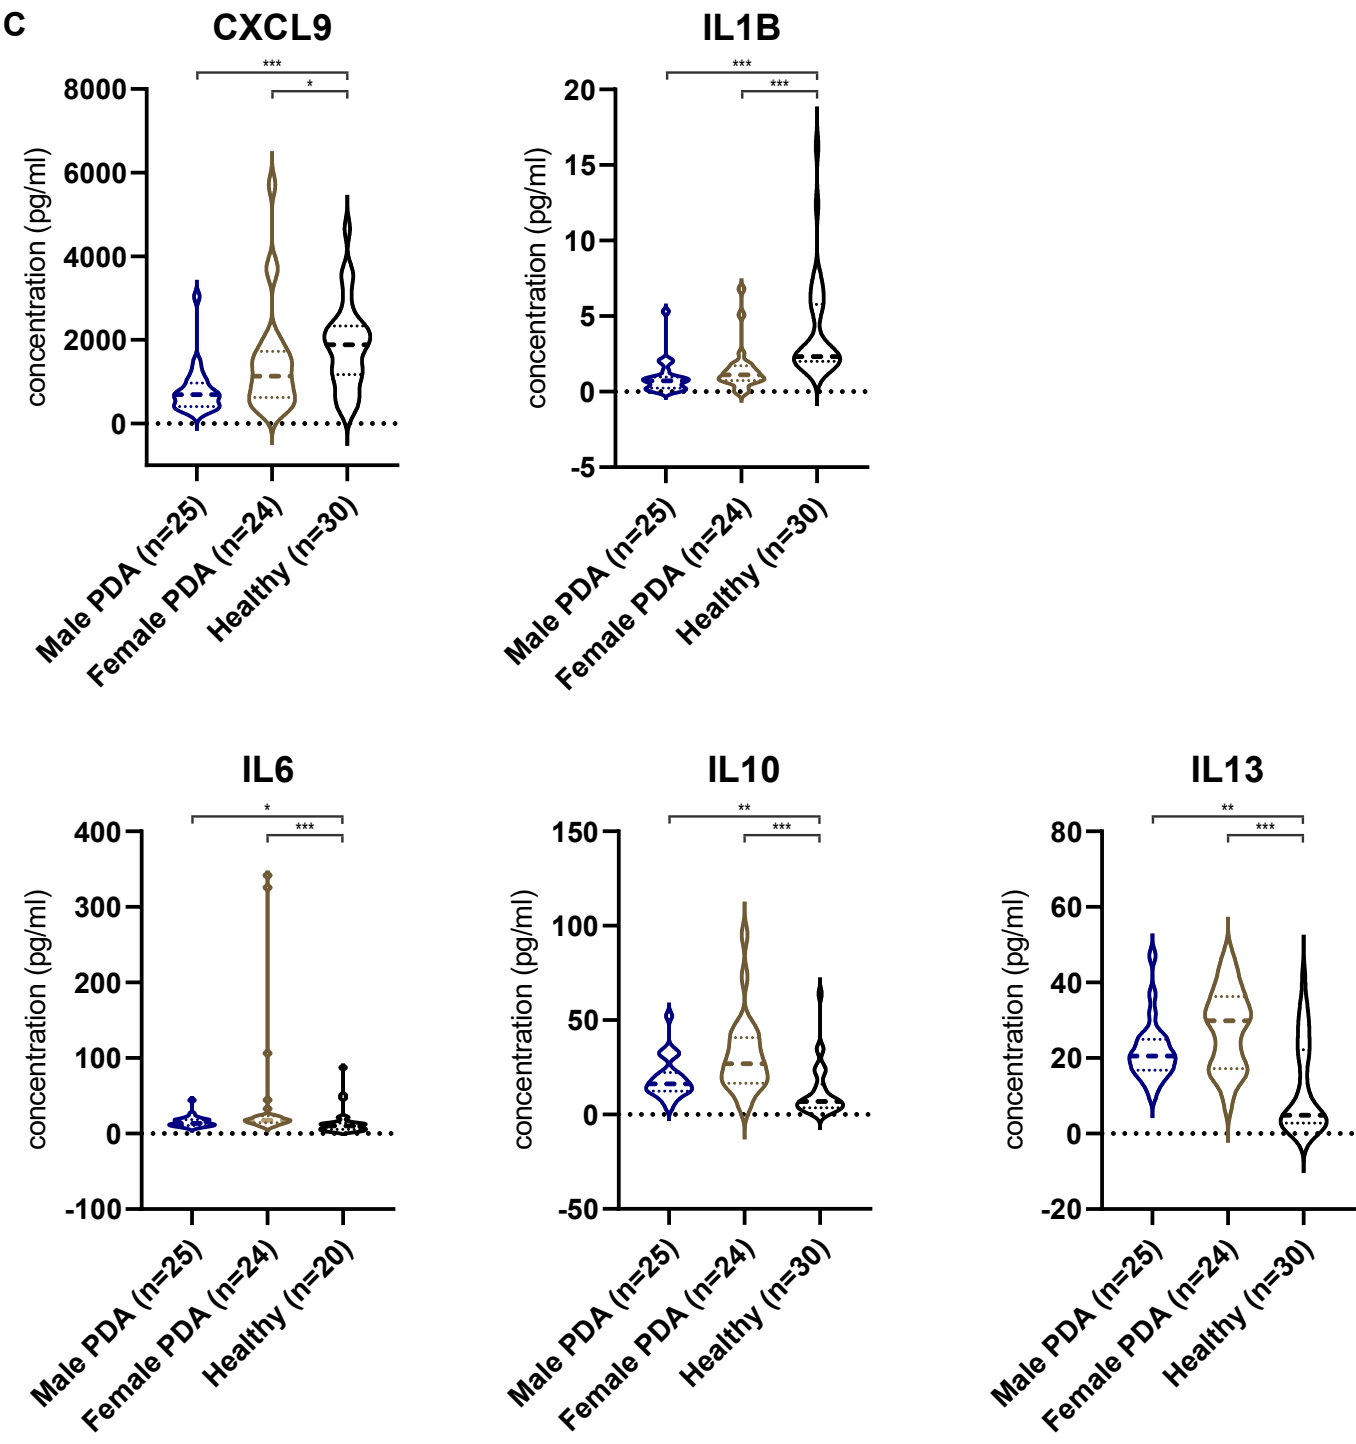

Supplemental Figure S2

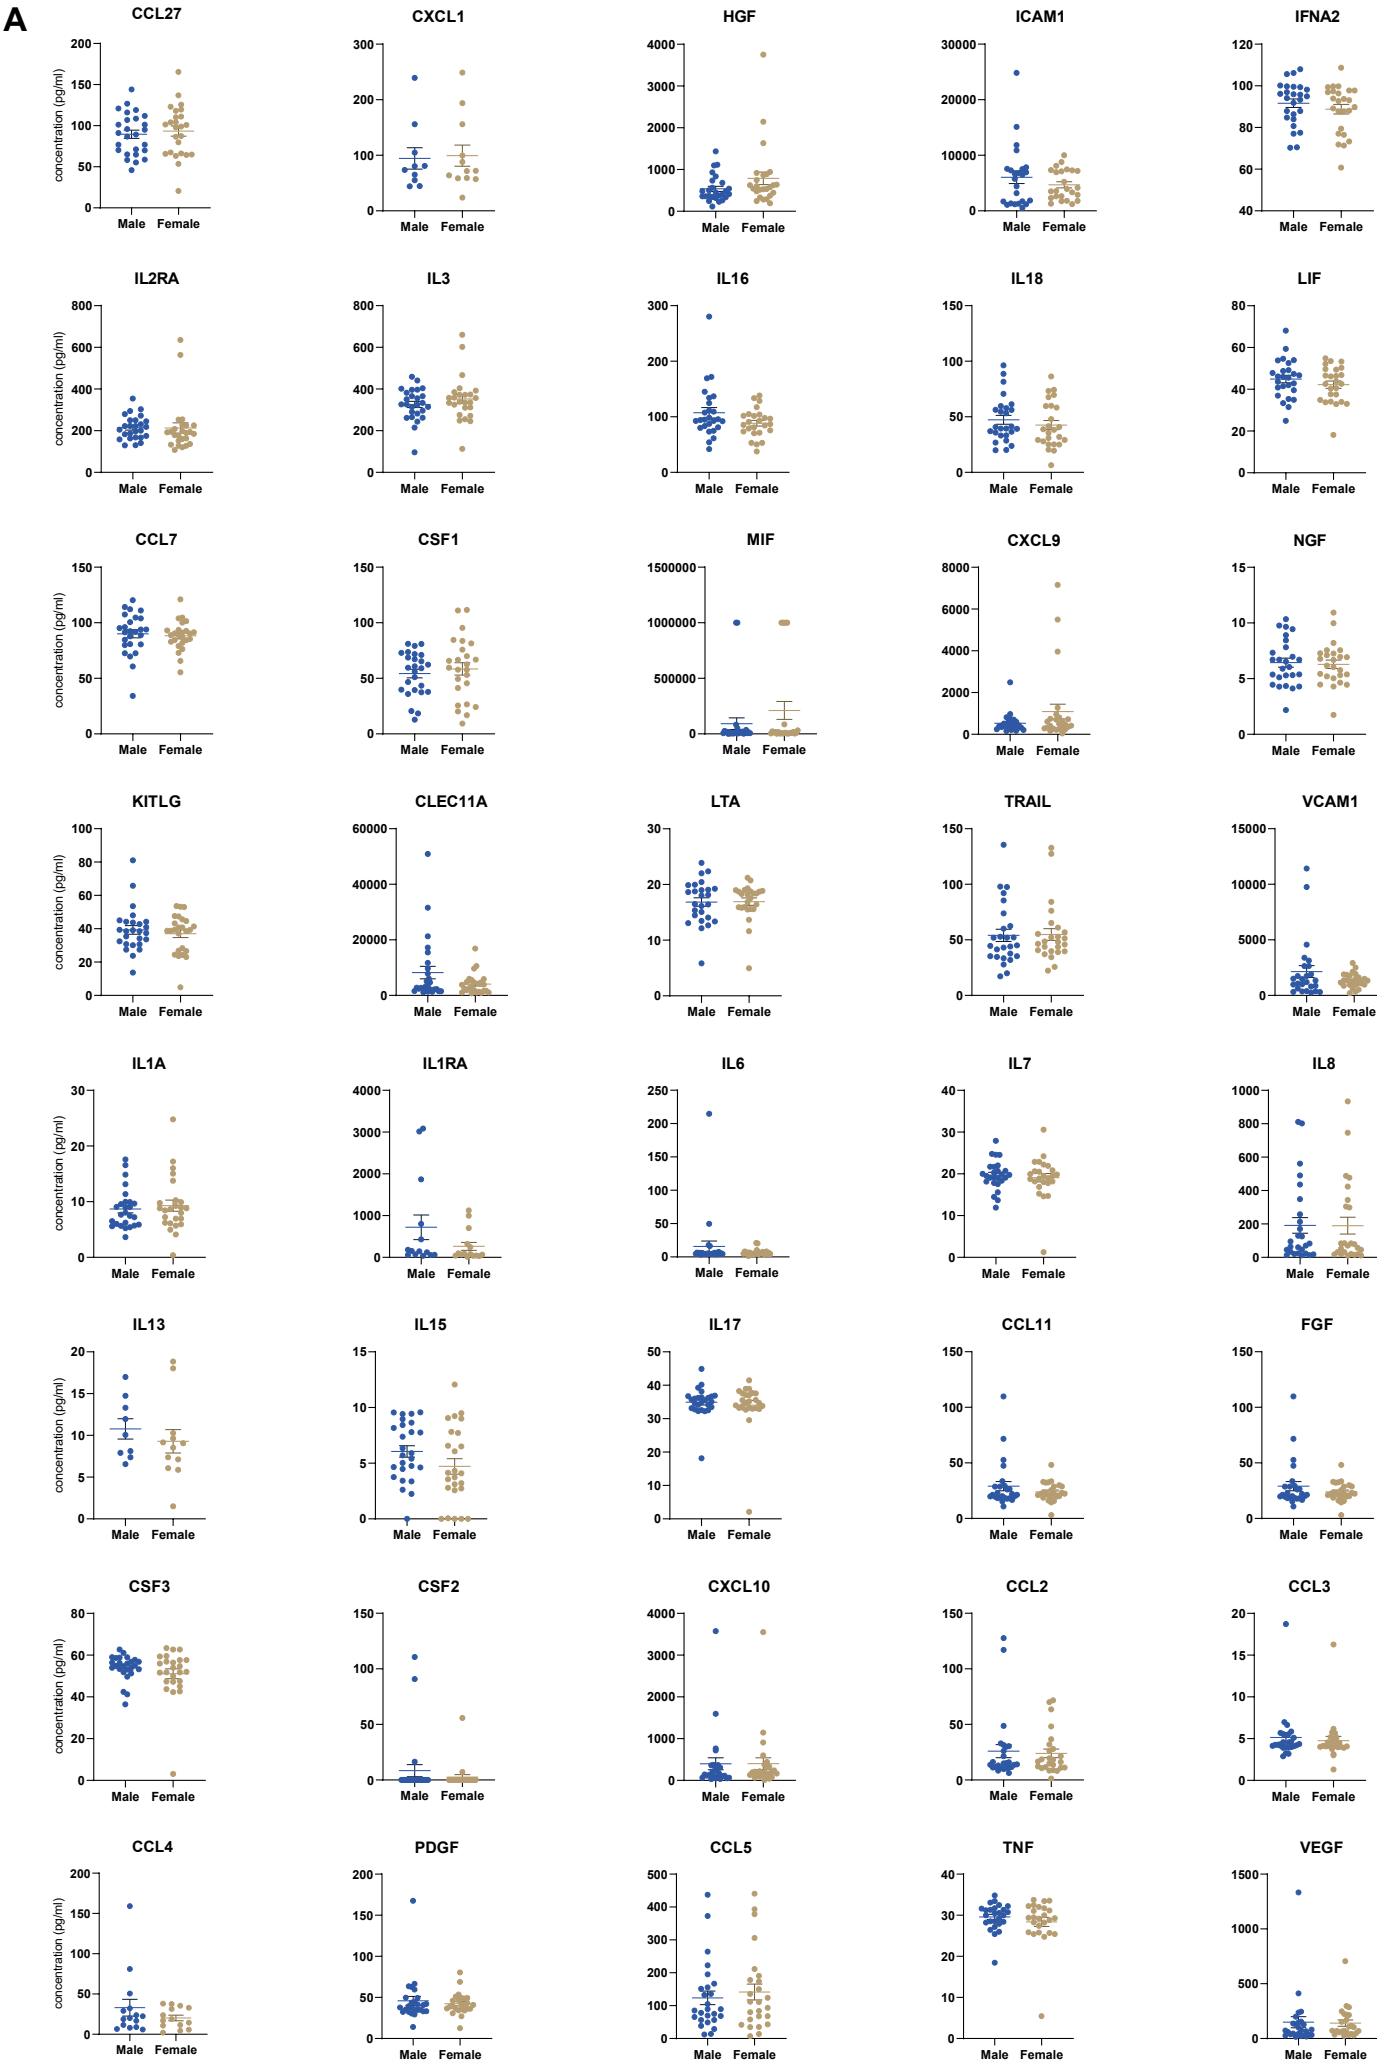

Supplemental Figure S2

B

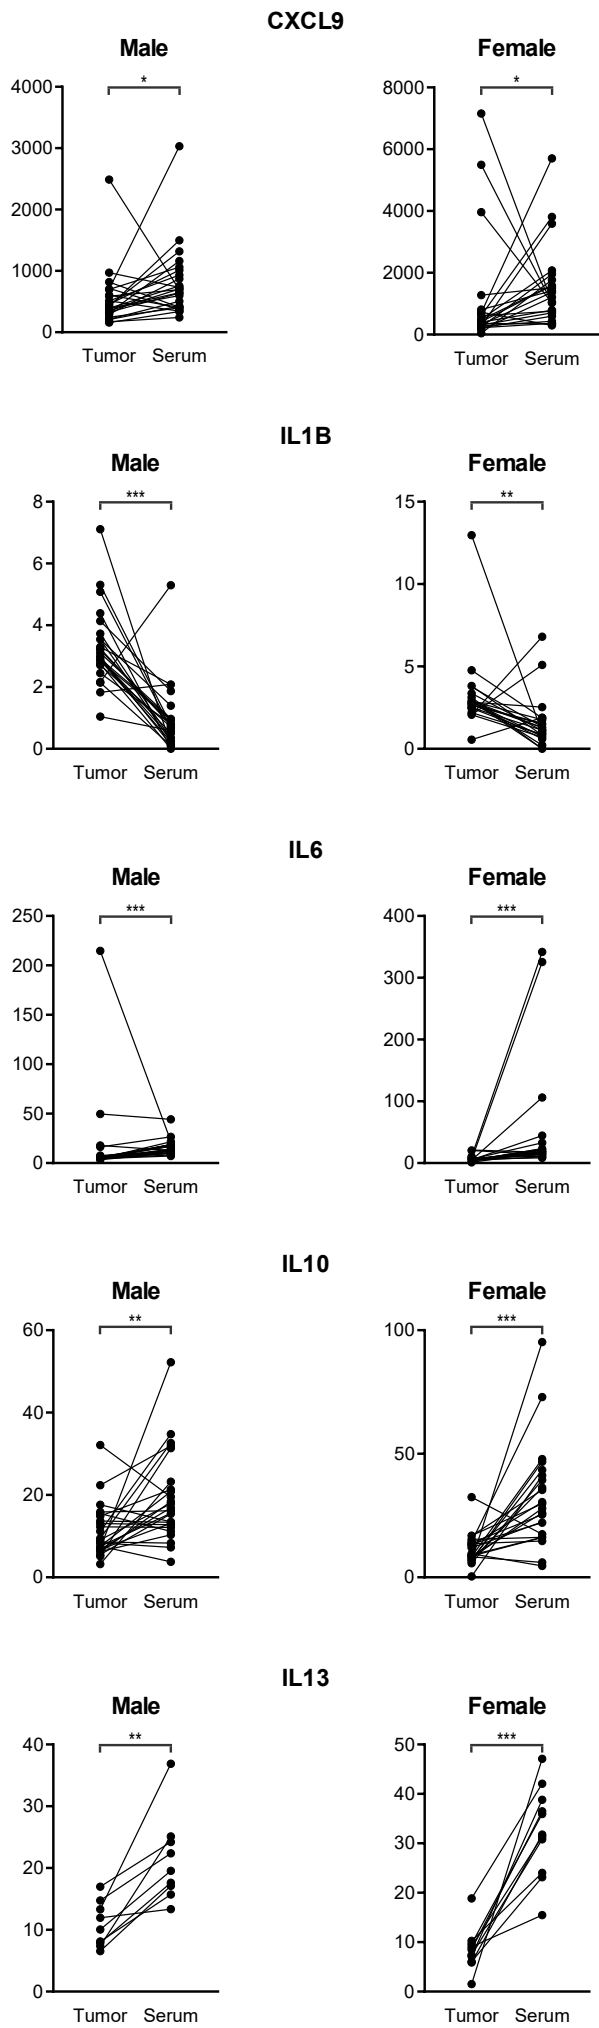

Supplemental Figure S2

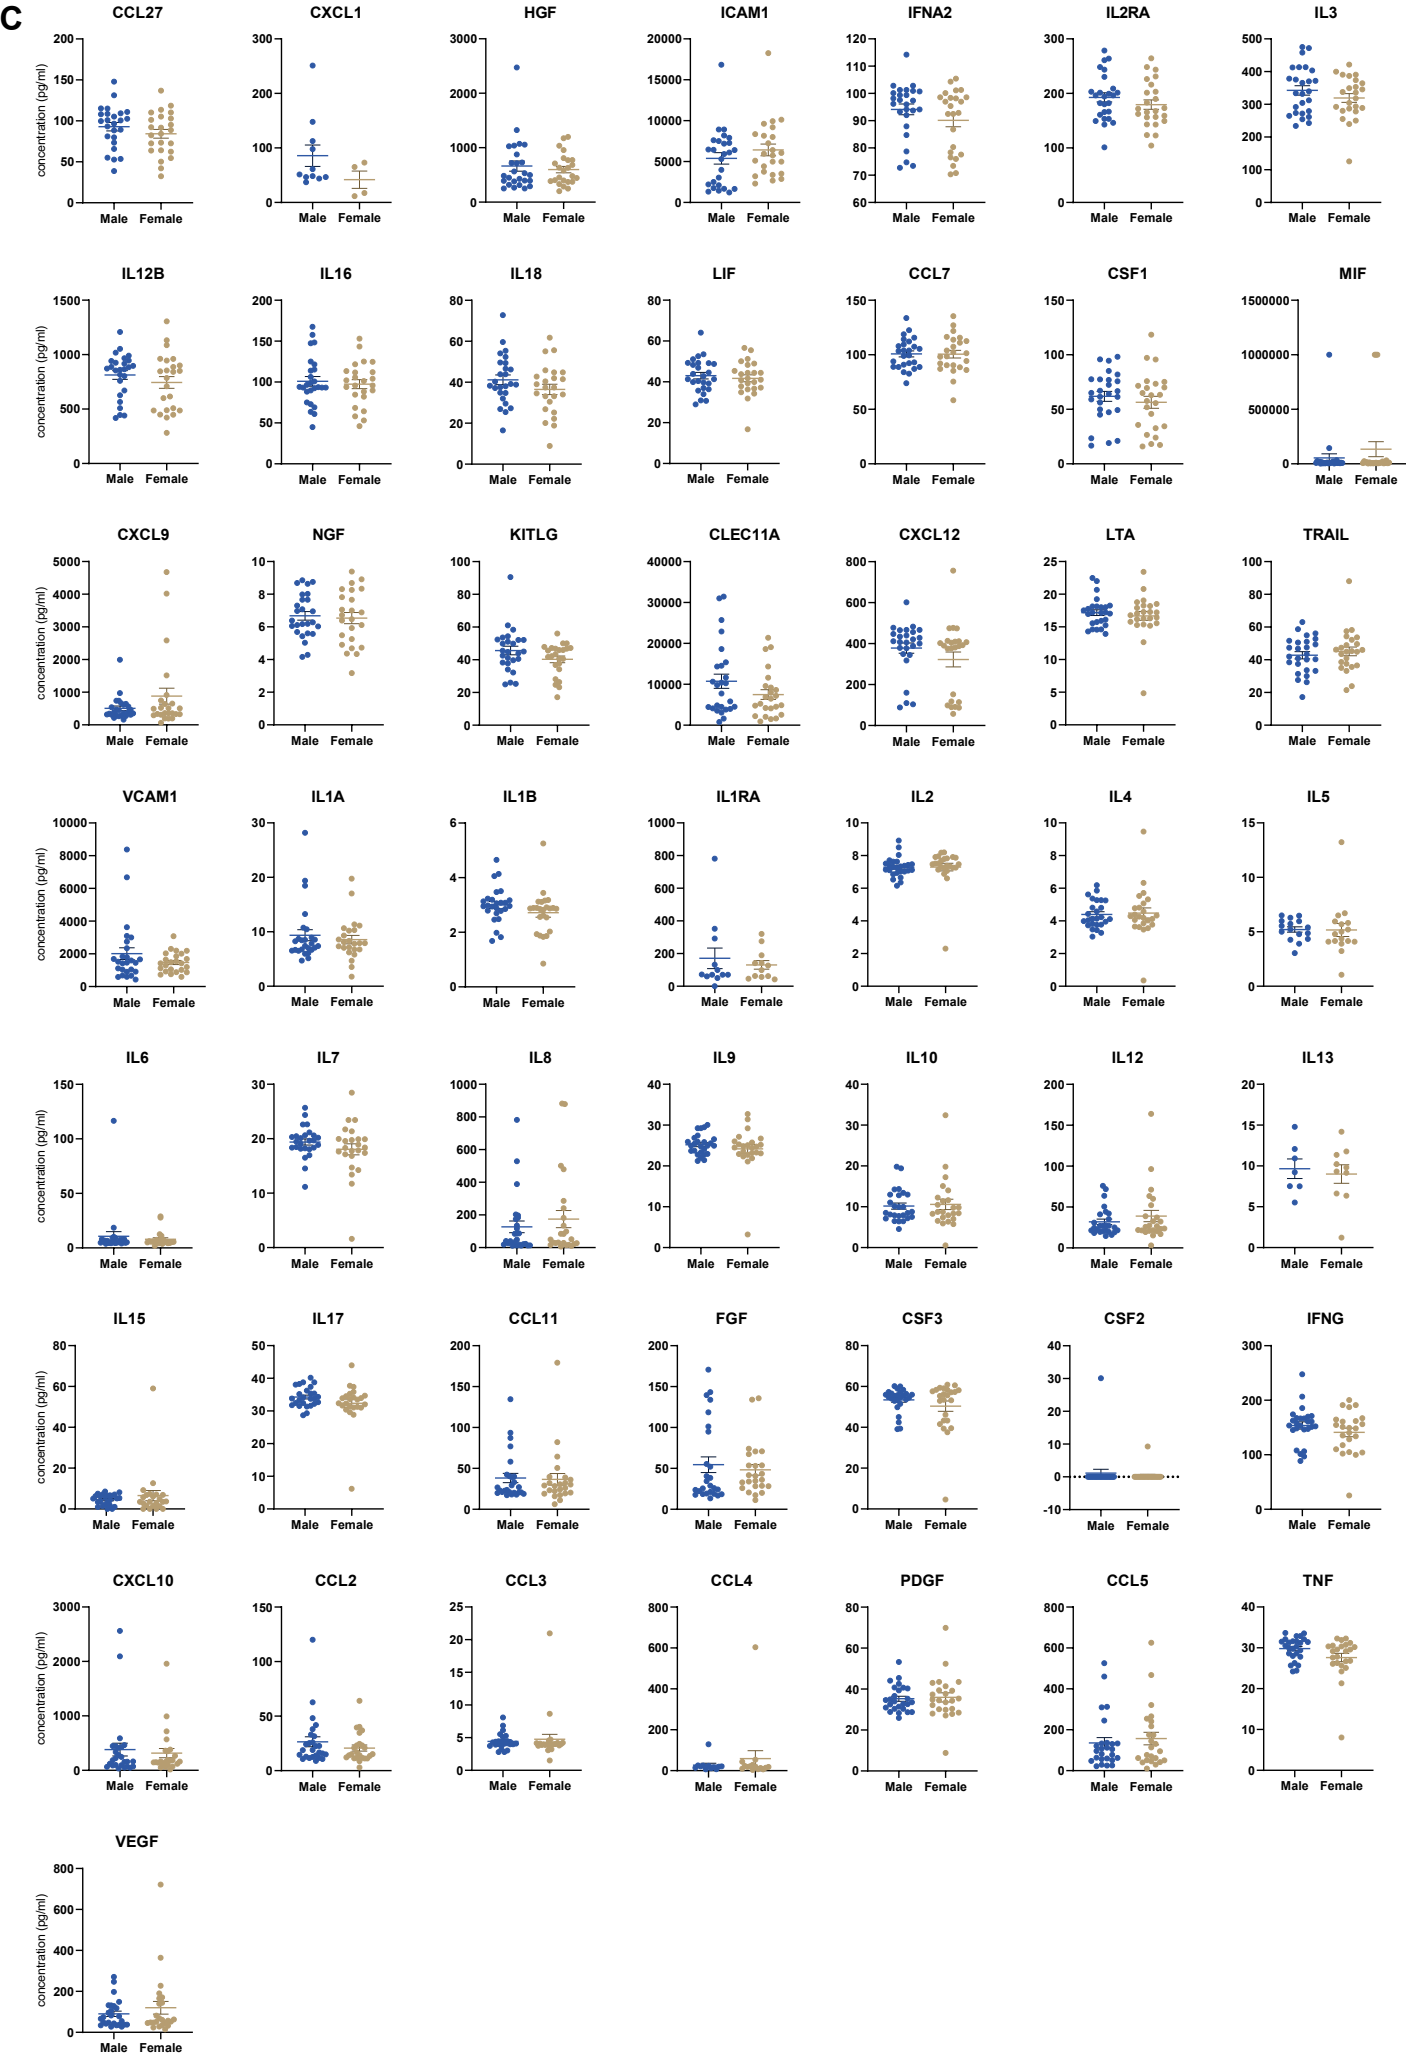



## Supplemental Figure S3

A

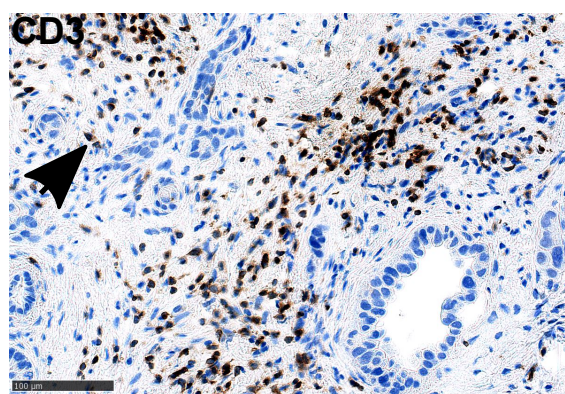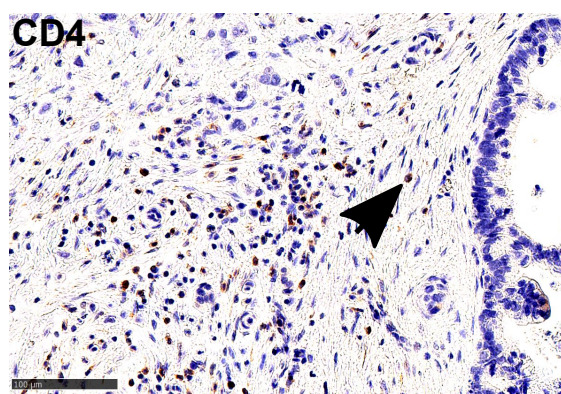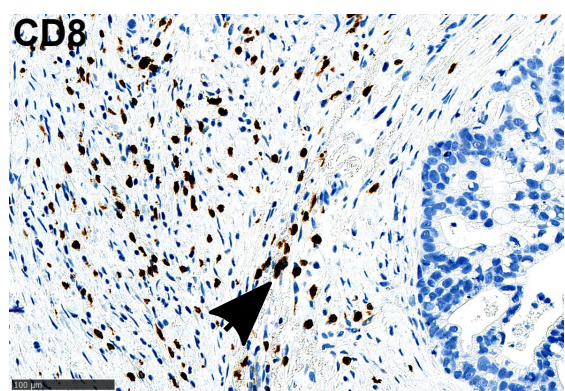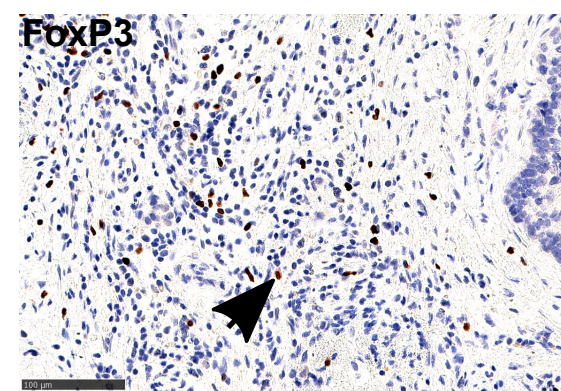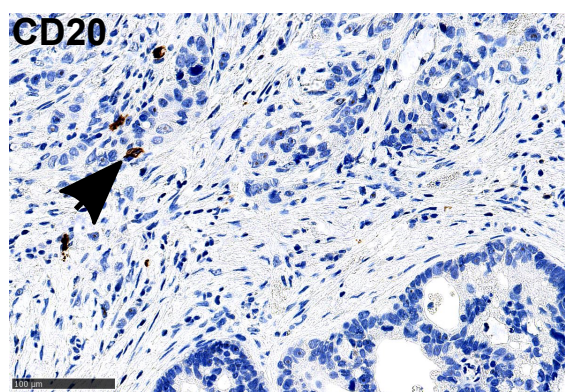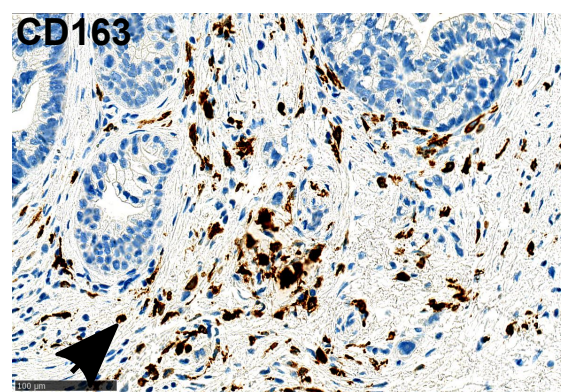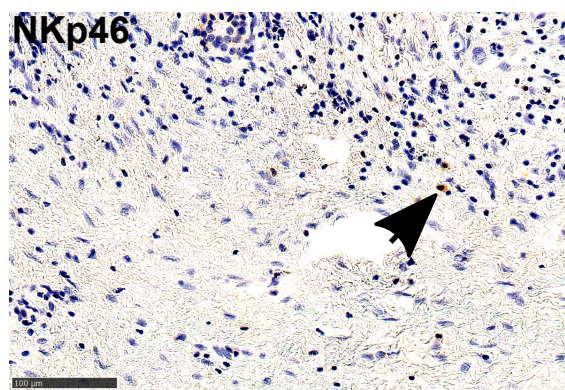



Supplemental Figure S3

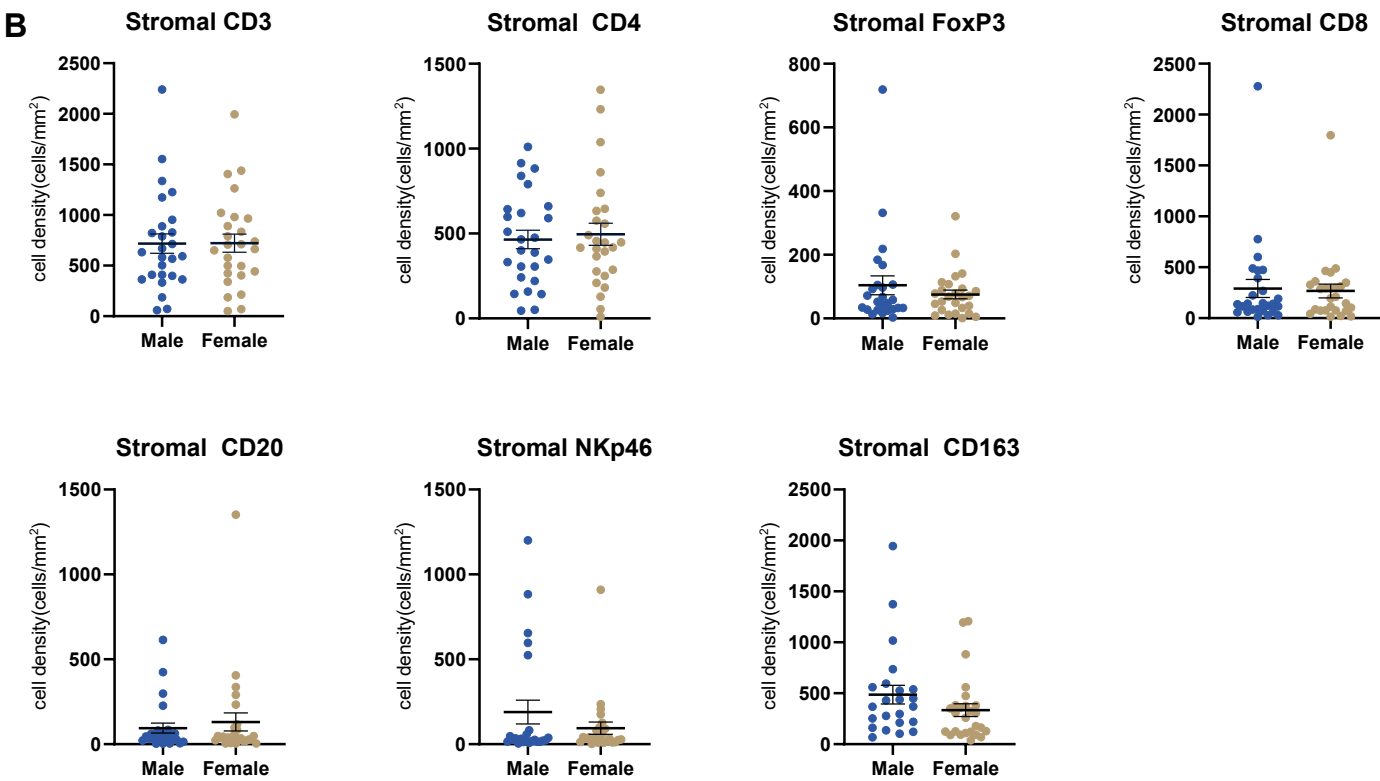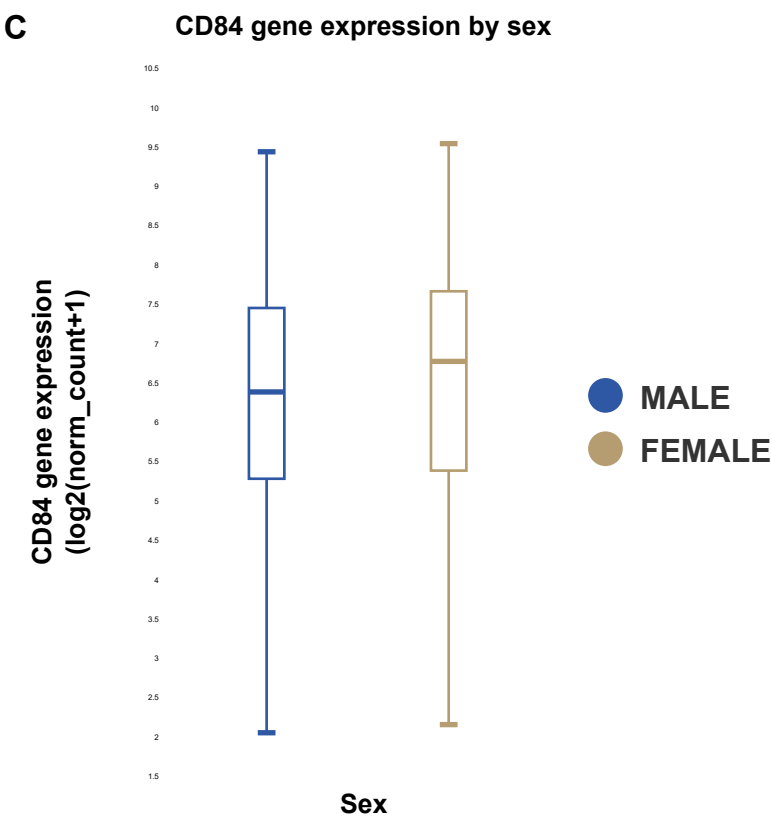

## **SUPPLEMENTAL FIGURE LEGENDS**

### **Supplemental Figure S1 Female pancreatic cancer patients show a stronger systemic immune response**

**(A)** Scatter dot plots comparing the serum concentration of immunological parameters (as indicated) in male (n= 25) and female (n= 24) PDA patients.

**(B)** Correlation analysis of systemic IL6 and CRP levels in all patients (n= 48).

**(C)** Violin plots comparing serum concentration of immunological parameters (as indicated) in healthy individuals (n=30) versus male (n=25) and female (n=24) PDA patients.

PDA= Pancreatic ductal adenocarcinoma. CRP= C-reactive protein. \*p≤0.05, \*\*p≤0.005, \*\*\*p≤0.0001.

### **Supplemental Figure S2 Male patients express higher tumoral levels of CXCL12**

**(A)** Scatter dot plots comparing the tumoral concentration of immunological parameters (as indicated) in male (n= 26) and female (n= 26) PDA patients.

**(B)** Comparison of male (n=25) and female (n=24) patients regarding the serum-to-tumor gradient of immunological parameters (as indicated).

**(C)** Scatter dot plots comparing the stromal concentration of immunological parameters (as indicated) in male (n= 26) and female (n= 24) PDA patients.

PDA= Pancreatic ductal adenocarcinoma. \*p≤0.05, \*\*p≤0.005, \*\*\*p≤0.0001.

### **Supplemental Figure S3 Microenvironmental immune cell infiltrate in pancreatic cancer patients by sex**

**(A)** Immunohistochemistry for immune cell types (as indicated). Examples of positively stained cells are highlighted (arrows). Scale bars, 100µm.

**(B)** Scatter dot plots comparing the stromal densities of different immune cell types (as indicated) in male (n= 26) and female (n= 26) PDA patients.

**(C)** Box plot comparing CD84 gene expression in male (n= 101) and female (n= 82) PDA patients. The data was obtained from the Xena platform.

PDA= Pancreatic ductal adenocarcinoma.

# SUPPLEMENTAL TABLES

**Supplemental Table S1.** Female patient characteristics (IL13 high vs. IL13 low subgroup)

|                                   |        | Female                        |                              | Total      |
|-----------------------------------|--------|-------------------------------|------------------------------|------------|
| Characteristic                    |        | IL13 high subgroup<br>(n= 12) | IL13 low subgroup<br>(n= 14) | (n= 26)    |
| Age (years)                       |        | 69.9 ± 3.6                    | 63.6 ± 2.6                   | 66.5 ± 2.2 |
| Body weight (kg)                  |        | 68.7 ± 3.9                    | 64.9 ± 2.2                   | 66.6 ± 2.1 |
| BMI                               |        | 26.5 ± 5.0                    | 24.2 ± 3.7                   | 25.2 ± 3.0 |
| Diabetes mellitus (n)             |        | 5                             | 3                            | 8          |
| Immunosuppressive drug intake (n) |        | 0                             | 0                            | 0          |
| Cardiovascular comorbidities (n)  |        | 10                            | 8                            | 18         |
| Pulmonary comorbidities (n)       |        | 2                             | 1                            | 3          |
| Renal comorbidities (n)           |        | 0                             | 2                            | 2          |
| Hepatic comorbidities (n)         |        | 0                             | 0                            | 0          |
| Autoimmune comorbidities (n)      |        | 1                             | 0                            | 1          |
| T                                 | T3 (n) | 12                            | 14                           | 26         |
|                                   | T4 (n) | 0                             | 0                            | 0          |
| N                                 | N0 (n) | 3                             | 2                            | 5          |
|                                   | N1 (n) | 9                             | 12                           | 21         |
| M                                 | M0 (n) | 11                            | 14                           | 25         |
|                                   | M1 (n) | 1                             | 0                            | 1          |
| Grade                             | G2 (n) | 8                             | 10                           | 18         |
|                                   | G3 (n) | 4                             | 4                            | 8          |
| R                                 | R0 (n) | 2                             | 0                            | 2          |
|                                   | R1 (n) | 10                            | 14                           | 24         |

Data are shown as mean ± SEM. BMI= body mass index (calculated as weight in kilograms divided by height in meters squared), T= stage of primary tumor, N= regional lymph node status, M= distant metastasis status, R= resection margin status.

**Supplemental Table S2.** Female patient characteristics (CD8 high vs. CD8 low subgroup)

|                                   |        | Female                      |                             | Total      |
|-----------------------------------|--------|-----------------------------|-----------------------------|------------|
| Characteristic                    |        | CD8 high subgroup<br>(n= 8) | CD8 low subgroup<br>(n= 18) | (n= 26)    |
| Age (years)                       |        | 70.0 ± 5.9                  | 66.8 ± 2.6                  | 66.5 ± 2.2 |
| Body weight (kg)                  |        | 73.0 ± 8.0                  | 65.1 ± 1.7                  | 66.6 ± 2.1 |
| BMI                               |        | 27.5 ± 8.8                  | 24.7 ± 2.9                  | 25.2 ± 3.0 |
| Diabetes mellitus (n)             |        | 2                           | 6                           | 8          |
| Immunosuppressive drug intake (n) |        | 0                           | 0                           | 0          |
| Cardiovascular comorbidities (n)  |        | 6                           | 12                          | 18         |
| Pulmonary comorbidities (n)       |        | 0                           | 3                           | 3          |
| Renal comorbidities (n)           |        | 0                           | 2                           | 2          |
| Hepatic comorbidities (n)         |        | 0                           | 0                           | 0          |
| Autoimmune comorbidities (n)      |        | 0                           | 1                           | 1          |
| T                                 | T3 (n) | 8                           | 18                          | 26         |
|                                   | T4 (n) | 0                           | 0                           | 0          |
| N                                 | N0 (n) | 1                           | 4                           | 5          |
|                                   | N1 (n) | 7                           | 14                          | 21         |
| M                                 | M0 (n) | 8                           | 17                          | 25         |
|                                   | M1 (n) | 0                           | 1                           | 1          |
| Grade                             | G2 (n) | 4                           | 14                          | 18         |
|                                   | G3 (n) | 4                           | 4                           | 8          |
| R                                 | R0 (n) | 0                           | 2                           | 2          |
|                                   | R1 (n) | 8                           | 16                          | 24         |

Data are shown as mean ± SEM. BMI= body mass index (calculated as weight in kilograms divided by height in meters squared), T= stage of primary tumor, N= regional lymph node status, M= distant metastasis status, R= resection margin status.
